# Supplementary material for: Checkpoint inhibitor-expressing lentiviral vaccine suppresses tumor growth in preclinical cancer models
Source: PubMed Central journal article supplement — J Immunother Cancer. 2024 Apr 24;12(4):e008761. doi: 10.1136/jitc-2023-008761 (PMC11043704; doi:10.1136/jitc-2023-008761), 2024-04-24
Supplement: jitc-2023-008761supp001.pdf [file jitc-2023-008761supp001.pdf]

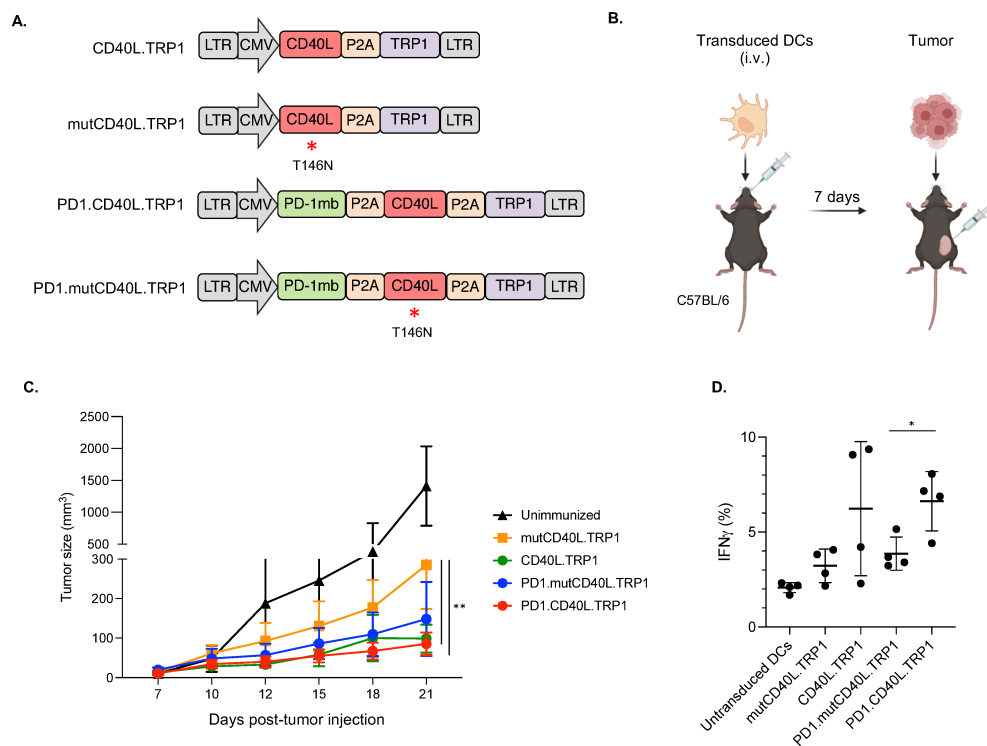

### Supplementary Figure 1. mutCD40L expressing vector loses anti-tumor activity.

(A) The structure of lentiviral vaccine vectors is diagrammed. The vectors express CD40L, mutated CD40L (T146N) and TRP1 and the PD-1 microbody (PD-1mb).

(B) Mice were immunized with DCs transduced by lentiviral vectors that encode a CD40L T146N mutation (mutCD40LCD40L.TRP1 and PD1.mutCD40L.TRP1). One-week post-immunization, the mice were inoculated with  $2.5 \times 10^5$  B16 melanoma cells (n=4).

(C) Tumor sizes were measured over 21 days.

(D) The fraction of IFN $\gamma$ + CD8 T cell in the spleen were determined by flow cytometry (\*P  $\leq$  0.05, \*\* P  $\leq$  0.01).

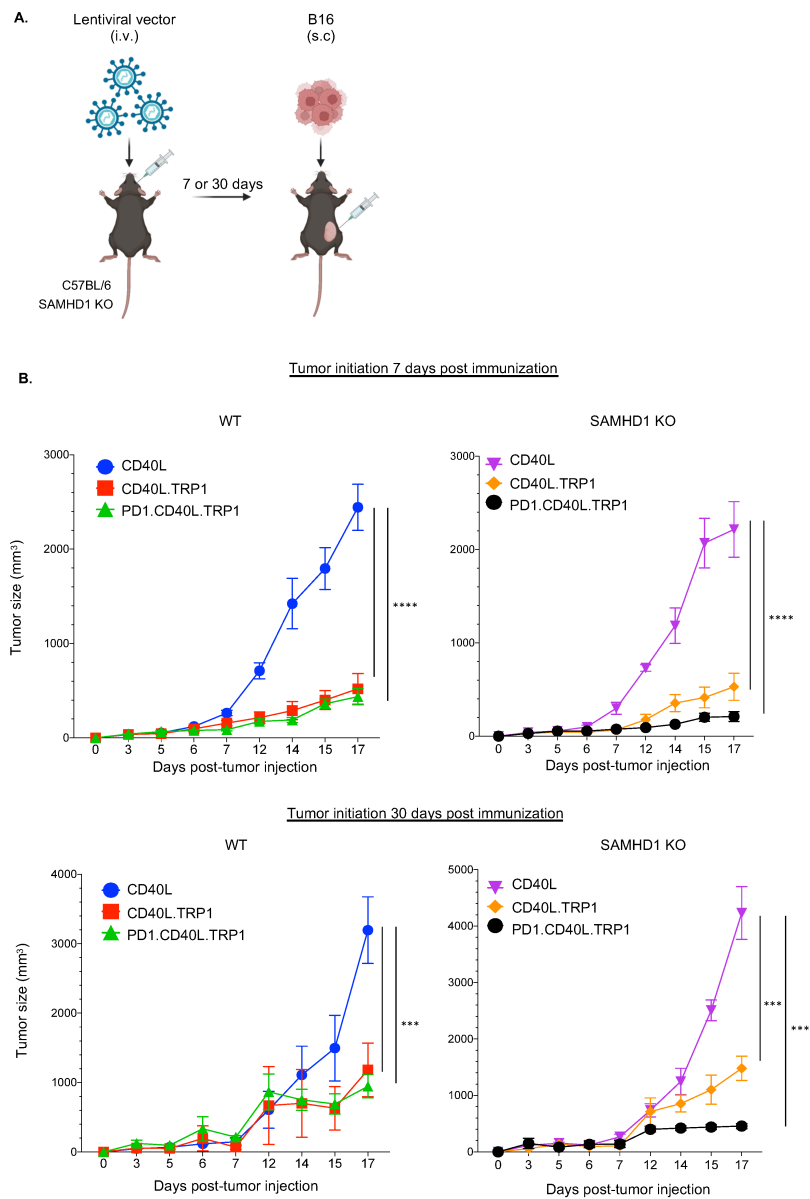

### Supplementary Figure 2. Comparison of vaccine efficacy in wild-type and SAMHD1 KO mice.

(A) As diagrammed, C57BL/6 and SAMHD1 KO mice were immunized by i.v. injection of CD40L, CD40L.TRP1, and PD1.CD40L.TRP1 vectors ( $3 \times 10^6$  I.U.). After 7 or 30 days, the mice were inoculated with  $2.5 \times 10^5$  B16 melanoma cells (n=5).

(B) Tumor sizes of mice inoculated with tumors 7 and 30-days post-vaccination were measured over 17 days.

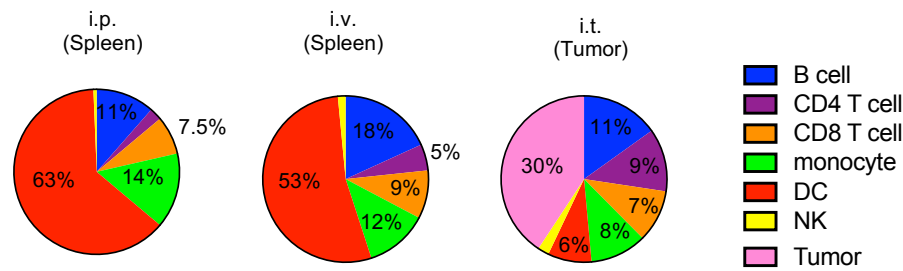

### Supplementary Figure 3. Transduction of APCs by direct lentiviral vector injection.

Mice were injected with  $3 \times 10^7$  I.U. GFP expressing lentiviral vector. After 5 days, splenocytes and TILs were stained with antibodies to CD3, CD4, CD8, CD19, CD49b, CD11c, CD115 and MHC II. GFP+ CD4 T cells (CD3+/CD4+), CD8 T cells (CD3+/CD8+), B cells (CD3-/CD19+), NK cells (CD3-/CD49b+), monocyte (CD115-/CD11b+), DCs (CD11c+/MHCII+), tumor (CD45-) and analyzed by flow cytometry. The results are shown as pie charts.
